# Supplementary material for: Identification of a long noncoding RNA signature to predict outcomes of glioblastoma
Source: PubMed Central journal article supplement — Mol Med Rep. 2019 Apr 24;19(6):5406–16. doi: 10.3892/mmr.2019.10184 (PMC6522932; doi:10.3892/mmr.2019.10184), 2019-04-24
Supplement: Supplementary_Data1.pdf [file Supplementary_Data1.pdf]

Table SI. Clinical features of the 255 patients with glioblastoma used for survival analysis.

| A, Training dataset (GSE16011, n=108)      |                |                 |                     |
|--------------------------------------------|----------------|-----------------|---------------------|
| Features                                   | Low-risk group | High-risk group | P-value             |
| n                                          | 54             | 54              |                     |
| Age (mean ± SD)                            | 47.1±12.7      | 57.1±11.5       | 0.245 <sup>a</sup>  |
| Sex                                        |                |                 |                     |
| Female                                     | 20 (37.0%)     | 15 (27.8%)      | 0.304 <sup>b</sup>  |
| Male                                       | 34 (63.0%)     | 39 (72.2%)      |                     |
| KPS (mean ± SD)                            | 84.4±13.7      | 83.5±12.8       | 0.719 <sup>a</sup>  |
| B, Independent dataset 1 (GSE7696, n=69)   |                |                 |                     |
| Features                                   | Low-risk group | High-risk group | P-value             |
| n                                          | 29             | 40              |                     |
| Age (mean ± SD)                            | 46.2±8.4       | 54.4±8.2        | <0.001 <sup>a</sup> |
| Sex                                        |                |                 |                     |
| Female                                     | 8 (27.6%)      | 11 (27.5%)      | 0.944 <sup>b</sup>  |
| Male                                       | 21 (72.4%)     | 29 (72.5%)      |                     |
| C, Independent dataset 2 (Rembrandt, n=78) |                |                 |                     |
| Features                                   | Low-risk group | High-risk group | P-value             |
| n                                          | 51             | 27              |                     |
| Age (mean ± SD)                            | 52.5±10.6      | 54.0±13.0       | 0.574 <sup>a</sup>  |
| Sex                                        |                |                 |                     |
| Female                                     | 21 (41.2%)     | 6 (22.2%)       | 0.106 <sup>b</sup>  |
| Male                                       | 30 (58.8%)     | 21 (77.8%)      |                     |
| KPS (mean ± SD)                            | 46.5±38.8      | 51.5±36.8       | 0.582 <sup>a</sup>  |
| D, Entire independent dataset (n=147)      |                |                 |                     |
| Features                                   | Low-risk group | High-risk group | P-value             |
| n                                          | 80             | 67              |                     |
| Age (mean ± SD)                            | 50.5±11.0      | 53.9±9.7        | 0.056 <sup>a</sup>  |
| Sex                                        |                |                 |                     |
| Female                                     | 29 (41.2%)     | 17 (22.2%)      | 0.157 <sup>b</sup>  |
| Male                                       | 51 (58.8%)     | 50 (77.8%)      |                     |
| E, Entire RT-TMZ Dataset (n=90)            |                |                 |                     |
| Features                                   | Low-risk group | High-risk group | P-value             |
| n                                          | 47             | 43              |                     |
| Age (mean ± SD)                            | 51.0±11.9      | 53.6±10.9       | 0.291 <sup>a</sup>  |
| Sex                                        |                |                 |                     |
| Female                                     | 14 (33.3%)     | 11 (23.5%)      | 0.656 <sup>b</sup>  |
| Male                                       | 33(66.7%)      | 32 (76.5%)      |                     |

Table SI. Continued.

---

F, Entire RT Dataset (n=57)

---

| Features            | Low-risk group | High-risk group | P-value            |
|---------------------|----------------|-----------------|--------------------|
| n                   | 33             | 24              |                    |
| Age (mean $\pm$ SD) | 49.1 $\pm$ 9.3 | 55.6 $\pm$ 6.9  | 0.438 <sup>a</sup> |
| Sex                 |                |                 |                    |
| Female              | 15 (45.5%)     | 6 (25.0%)       | 0.114 <sup>b</sup> |
| Male                | 18 (54.5%)     | 18 (75.0%)      |                    |

---

<sup>a</sup>Student's t-test; <sup>b</sup> $\chi^2$  test. KPS, Karnofsky performance status; SD, standard deviation.

---
